# Supplementary material
Source: PubMed Central journal article supplement (PMC10992262)

Supplemental Figure 1: Flow cytometry panels and gating strategies

**a.**

| Panel 1   |             |                |             |           |      |
|-----------|-------------|----------------|-------------|-----------|------|
| Marker    | Fluorophore | Antibody Clone | Catalogue # | Vendor    | DF   |
| CD3       | PerCP 5.5   | OKT3           | 45-0037-42  | eBio      | 120  |
| CD4       | FITC        | OKT4           | 11-0048-42  | eBio      | 500  |
| CD8       | APC         | BW135/80       | 130-091-076 | Miltenyi  | 120  |
| CD69      | PE          | FN50           | 12-0699-42  | eBio      | 30   |
| CD71      | BV421       | M-A712         | 562995      | BD        | 50   |
| CD45RA    | PE Cy7      | HI100          | 25-0458-42  | eBio      | 60   |
| CCR7      | BV510       | GO43H7         | 353232      | Biolegend | 30   |
| Live/Dead | Zombie NIR  | n/a            | 423105      | Biolegend | 2500 |

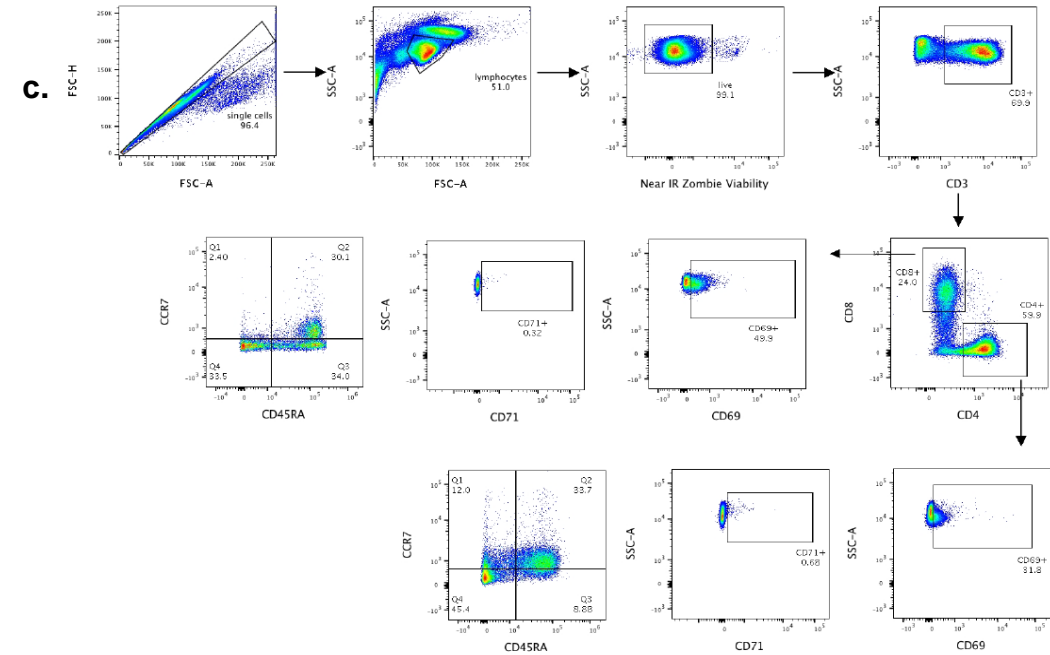

**b.**

| Panel 2   |             |                |             |           |      |
|-----------|-------------|----------------|-------------|-----------|------|
| Marker    | Fluorophore | Antibody Clone | Catalogue # | Vendor    | DF   |
| CD3       | BV650       | UCHT1          | 563852      | BD        | 30   |
| CD4       | FITC        | OKT4           | 11-0048-42  | eBio      | 500  |
| CD8       | BV786       | RPA-T8         | 563823      | BD        | 60   |
| CD25      | PE          | BC96           | 12-0259-42  | eBio      | 60   |
| CD56      | BV421       | HCD56          | 318328      | Biolegend | 30   |
| CD127     | APC         | eBioRDR5       | 17-1278-42  | eBio      | 30   |
| CD19      | Pe Cy7      | SJ25c1         | 25-0198-42  | eBio      | 150  |
| Live/Dead | Zombie NIR  | n/a            | 423105      | Biolegend | 2500 |

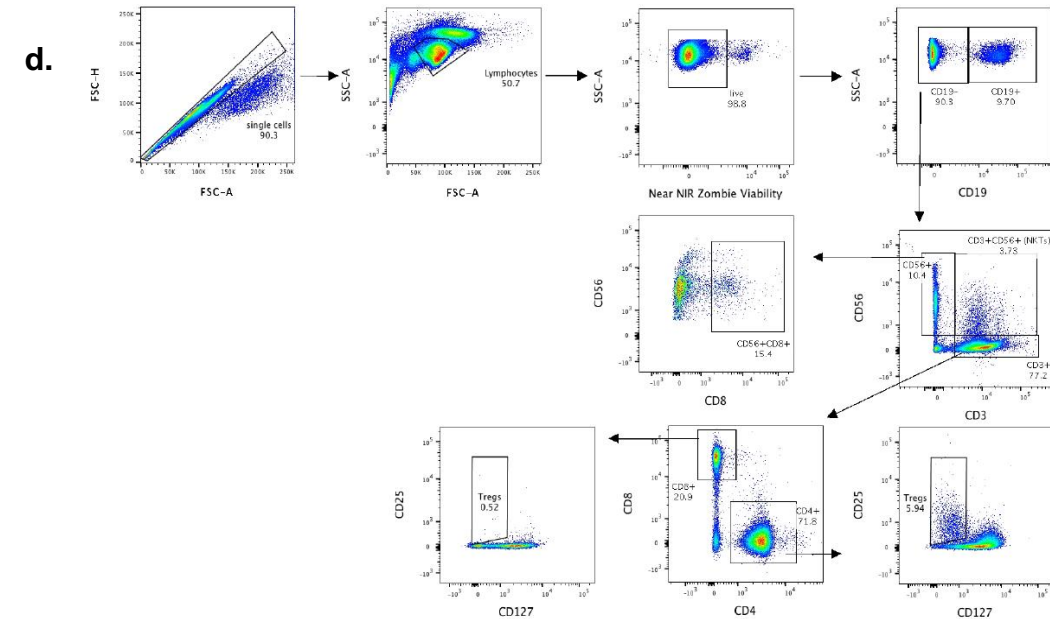

Supplemental Figure 2: Plasma Levels of Prexasertib and LY3300054

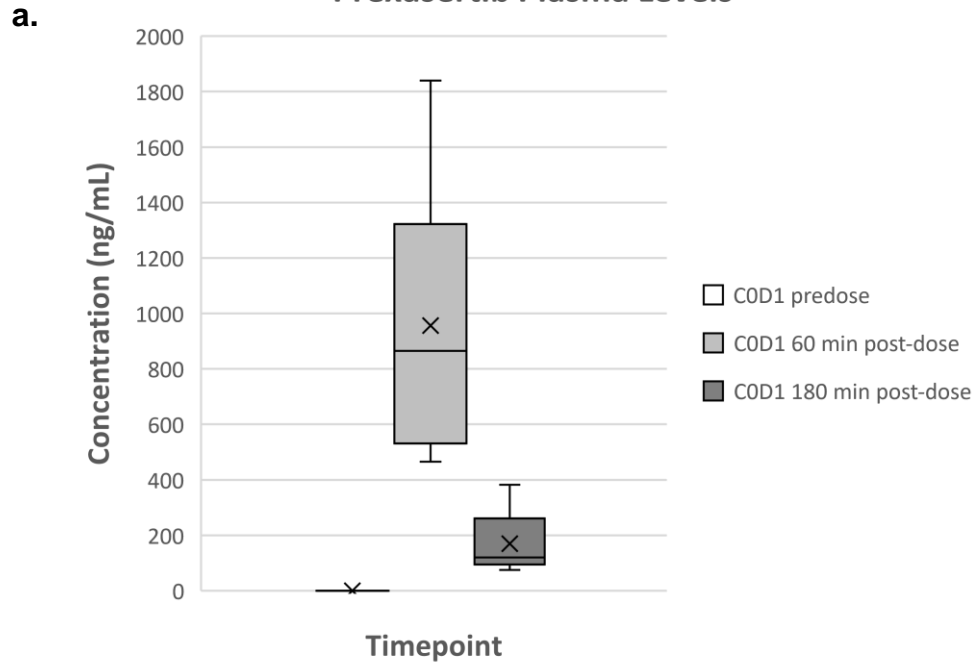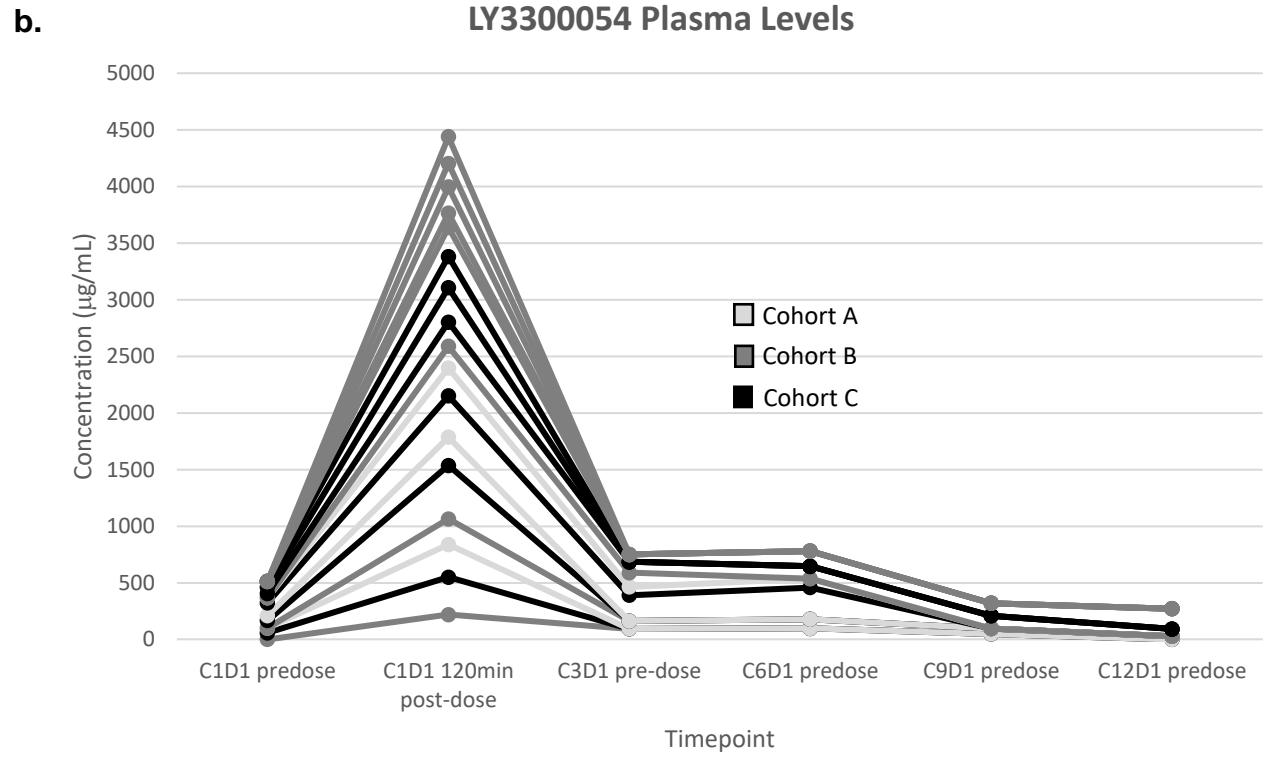

Supplement: 262_2021_2910_MOESM1_ESM.pdf [file 262_2021_2910_MOESM1_ESM.pdf]
